# Supplementary material for: Endogenous opioids regulate moment-to-moment neuronal communication and excitability
Source: PubMed Central journal article supplement (PMC5364458; doi:10.1038/ncomms14611), 2017-03-22
Supplement: ncomms14611-s1.pdf [file ncomms14611-s1.pdf]

## SUPPLEMENTARY INFORMATION

### Supplementary Figure 1.

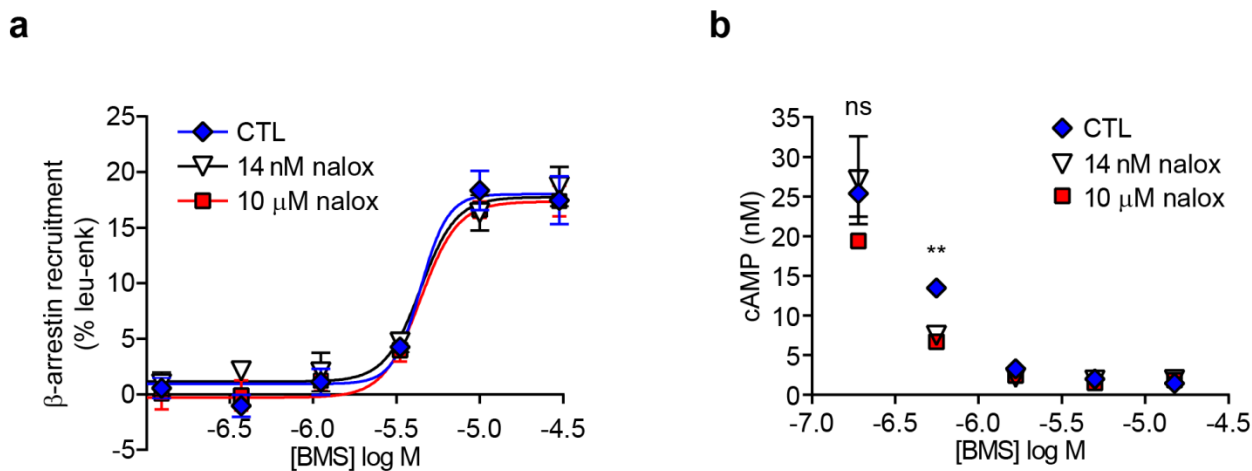

#### Supplementary Figure 1. Agonist activity of BMS-198187 is not blocked by the orthosteric antagonist naloxone.

Assays of  $\beta$ -arrestin recruitment or cAMP accumulation were used on CHO-OPRD1 cells, stably transfected with DOR to assess BMS-198187 (BMS) agonist activity in the presence/absence of naloxone at control (CTL, no naloxone), low (14 nM) and high (10  $\mu$ M) concentrations. **(a)** dose-response curves (n=6) showing BMS-198187 increased  $\beta$ -arrestin recruitment in a dose dependent manner under control conditions (blue, diamond) which was unaffected by low (white, triangle) or high (red, square) concentrations of naloxone. **(b)** CHO-ORPD1 cells were stimulated with 5  $\mu$ M forskolin in the presence/absence of differing concentrations of BMS-198187 and naloxone (n=4). In the absence of BMS-198187, naloxone (10  $\mu$ M) had no effect on total cAMP levels when compared to control forskolin stimulation (CTL:  $29.7 \pm 1.8$  nM, n=4, grey line; naloxone:  $30.6 \pm 3.5$  nM, n=4, black line;  $p < 0.05$ , unpaired *t*-test). BMS-198187 completely abolished cAMP detection at concentrations higher than 1.67  $\mu$ M, indicating full agonist activity at DOR. This was unaffected by naloxone at both low and high concentrations. At lower concentrations of BMS-198187 (< 560 nM), naloxone seemed to reduced cAMP levels which is opposite to the expected outcome of an opioid receptor antagonist, which would ordinarily increase cAMP levels by inhibiting  $G\alpha_{i/o}$  signaling. These data provide strong evidence to indicate BMS-198187 agonist activity is not inhibited by the orthosteric ligand naloxone. Thus any action of BMS-198187 that is reversed by naloxone is likely to be through PAM activity of BMS-198187 which is acting with and enhancing the signaling of an orthosteric agonist. Data are represented as mean  $\pm$  S.E.M.
